# Supplementary material for: Activation of Adenosine A1 Receptor in Ischemic Stroke: Neuroprotection by Tetrahydroxy Stilbene Glycoside as an Agonist
Source: MDPI journal article supplement (doi:10.3390/antiox10071112), 2021-07-12
Supplement: s1 [file s1]

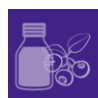

# Supplementary Material: Activation of Adenosine A<sub>1</sub> Receptor in Ischemic Stroke: Neuroprotection by Tetrahydroxy Stilbene Glycoside as an Agonist

Lingyu Ruan, Guanghui Li, Wenlong Zhao, Huihui Meng, Qi Zheng and Junsong Wang \*

Center for Molecular Metabolism, Nanjing University of Science and Technology, 200 Xiao Ling Wei Street, Nanjing 210094, China; ruanlingyuamy@njust.edu.cn (L.R.); lguanghui12@njust.edu.cn (G.L.); 217102010089@njust.edu.cn (W.Z.); menghuihui2014@njust.edu.cn (H.M.); zhengqi@njust.edu.cn (Q.Z.)

\* Correspondence: wangjunsong@njust.edu.cn; Tel./Fax: +86-139-1397-6393

## Supportive data

Raw images of all blots in Figure 6, 7 and supplementary Figure S1, S2 are provided as a supportive data in supplement; each image is named of the appropriate panel of the main figure. Images of repeated experiments were also included and marked with word R (short for Repeat) in the name suffix.

## Supplemental Tables

Table S1. <sup>1</sup>H NMR assignment of metabolites in rats' brain.

| No. | Metabolites          | Assignments                                                         | Chemical shifts(ppm)          |
|-----|----------------------|---------------------------------------------------------------------|-------------------------------|
| 1   | Isoleucine           | δCH <sub>3</sub> , γCH <sub>3</sub>                                 | 0.94 (t), 1.015 (d)           |
| 2   | Leucine              | δCH <sub>3</sub>                                                    | 0.97 (dd)                     |
| 3   | Valine               | γCH <sub>3</sub> , γCH <sub>3</sub>                                 | 0.99 (d), 1.05 (d)            |
| 4   | 3-Hydroxybutyrate    | γCH <sub>3</sub>                                                    | 1.21(d)                       |
| 5   | 2-Hydroxyisobutyrate | CH <sub>3</sub>                                                     | 1.32(s)                       |
| 6   | Lactate              | CH <sub>3</sub> , CH                                                | 1.34 (d), 4.12 (q)            |
| 7   | Alanine              | βCH <sub>3</sub>                                                    | 1.49 (d)                      |
| 8   | Lysine               | δCH <sub>2</sub>                                                    | 1.74(m)                       |
| 9   | 4-Aminobutyrate      | αCH <sub>2</sub> , βCH <sub>2</sub> , γCH <sub>2</sub>              | 1.91(m), 2.3(t), 3.02(t)      |
| 10  | N-acetyl aspartate   | CH <sub>3</sub> , CH <sub>2</sub>                                   | 2.02 (s), 2.51 (dd), 2.7 (dd) |
| 11  | Glutamate            | βCH <sub>2</sub> , γCH <sub>2</sub>                                 | 2.08(m), 2.36(m)              |
| 12  | Succinate            | CH <sub>2</sub>                                                     | 2.41(s)                       |
| 13  | Glutamine            | βCH <sub>2</sub> , γCH <sub>2</sub>                                 | 2.46(m)                       |
| 14  | Aspartate            | βCH <sub>2</sub> , α-CH                                             | 2.67(m), 2.82(m)              |
| 15  | Trimethylamine       | CH <sub>3</sub>                                                     | 2.88(s)                       |
| 16  | Creatine             | CH <sub>2</sub> , CH <sub>3</sub>                                   | 3.04 (s), 3.93 (s)            |
| 17  | Choline              | N(CH <sub>3</sub> ) <sub>3</sub>                                    | 3.21 (s)                      |
| 18  | Phosphocholine       | N-CH <sub>2</sub>                                                   | 3.218 (s)                     |
| 19  | Taurine              | NH <sub>2</sub> -CH <sub>2</sub> , SO <sub>3</sub> -CH <sub>2</sub> | 3.27 (t), 3.43 (t)            |
| 20  | Myo-inositol         | CH                                                                  | 3.52 (dd), 3.61 (t), 4.1 (s)  |
| 21  | Glycine              | CH <sub>2</sub>                                                     | 3.57(s)                       |
| 22  | Threonine            | C <sub>2</sub> H                                                    | 3.585(d)                      |
| 23  | Ascorbate            | CH                                                                  | 4.52(d)                       |
| 24  | Adenosine            | CH-OH, N=CH-N                                                       | 6.09(d), 8.25 (s), 8.34 (s)   |
| 25  | Inosine              | O-CH-N, N-CH=N CH=N                                                 | 6.10 (d), 8.23 (s), 8.34 (s)  |
| 26  | Uridine              | H <sub>5</sub> , H <sub>6</sub> , H <sub>1</sub> '                  | 5.9 (d), 7.9 (d)              |
| 27  | Uracil               | CH=CH-N                                                             | 5.79(d), 7.54(d)              |
| 28  | AMP                  | N=CH-N, N=CH-N                                                      | 8.23 (s), 8.6 (s)             |
| 29  | ADP                  | 2'-CH                                                               | 8.585(s)                      |
| 30  | ATP                  | 2'-CH                                                               | 8.535(s)                      |
| 31  | Fumarate             | CH=CH                                                               | 6.52(s)                       |

|    |               |                                                                |                    |
|----|---------------|----------------------------------------------------------------|--------------------|
| 32 | Tyrosine      | H3/H5, C5H/C6H                                                 | 6.90 (d), 7.20 (d) |
| 33 | Phenylalanine | CH-NH <sub>2</sub>                                             | 7.38(m)            |
| 34 | Niacinamide   | H <sub>2</sub> /H <sub>4</sub> /H <sub>5</sub> /H <sub>6</sub> | 7.58 (dd)          |
| 35 | Histidine     | 2'-CH                                                          | 7.915 (s)          |
| 36 | Xanthine      | NH=CH-N                                                        | 7.945(s)           |
| 37 | Oxypurinol    | CH                                                             | 8.245(s)           |
| 38 | Formate       | CH                                                             | 8.465 (s)          |

s, singlet; d, doublet; t, triplet; q, quartet; m, multiple; dd, doublet of doublets, dt, doublet of triplets.

**Table S2.** The prediction targets of TSG on stroke.

| Target Name                                                   | Organism              | id            | Score | GENE name |
|---------------------------------------------------------------|-----------------------|---------------|-------|-----------|
| Tyrosinase                                                    | Homo sapiens          | CHEMBL1973    | 100   | TYR       |
| Aldose reductase                                              | Rattus norvegicus     | CHEMBL2622    | 100   | Akr1b7    |
| Sodium/glucose cotransporter 2                                | Homo sapiens          | CHEMBL3884    | 100   | SLC5A2    |
| Coagulation factor III                                        | Homo sapiens          | CHEMBL4081    | 100   | F3        |
| Carbonic anhydrase IV                                         | Homo sapiens          | CHEMBL3729    | 100   | CA4       |
| Low affinity sodium-glucose cotransporter                     | Homo sapiens          | CHEMBL1770047 | 100   | SLC5A2    |
| Carbonic anhydrase XIV                                        | Homo sapiens          | CHEMBL3510    | 100   | CA14      |
| Glycogen phosphorylase, muscle form                           | Oryctolagus cuniculus | CHEMBL4696    | 100   | PYGM      |
| Carbonic anhydrase VII                                        | Homo sapiens          | CHEMBL2326    | 100   | CA7       |
| Maltase-glucoamylase                                          | Homo sapiens          | CHEMBL2074    | 100   | MGAM      |
| Carbonic anhydrase XII                                        | Homo sapiens          | CHEMBL3242    | 100   | CA12      |
| Dual specificity tyrosine-phosphorylation-regulated kinase 1A | Rattus norvegicus     | CHEMBL5508    | 100   | DYRK1A    |
| Glyceraldehyde-3-phosphate dehydrogenase liver                | Homo sapiens          | CHEMBL2284    | 100   | GAPDH     |
| Acidic alpha-glucosidase                                      | Rattus norvegicus     | CHEMBL3513    | 100   | Gaa       |
| Intestinal alkaline phosphatase                               | Mus musculus          | CHEMBL3151    | 100   | Iap       |
| Cytochrome P450 1B1                                           | Homo sapiens          | CHEMBL4878    | 100   | CYP1B1    |
| Carbonic anhydrase III                                        | Homo sapiens          | CHEMBL2885    | 100   | CA3       |
| Cytochrome P450 1A1                                           | Homo sapiens          | CHEMBL2231    | 100   | CYP1A1    |
| Nuclear factor NF-kappa-B p105 subunit                        | Homo sapiens          | CHEMBL3251    | 100   | NFKB1     |
| Carbonic anhydrase VA                                         | Homo sapiens          | CHEMBL4789    | 99.99 | CA5A      |
| Carbonic anhydrase IX                                         | Homo sapiens          | CHEMBL3594    | 99.98 | CA9       |
| DNA- (apurinic or apyrimidinic site) lyase                    | Homo sapiens          | CHEMBL5619    | 99.97 | OGG1      |
| Carbonic anhydrase XIII                                       | Homo sapiens          | CHEMBL3912    | 99.96 | CA13      |
| DNA (cytosine-5)-methyltransferase 1                          | Homo sapiens          | CHEMBL1993    | 99.62 | DNMT1     |
| 6-O-methylguanine-DNA methyltransferase                       | Homo sapiens          | CHEMBL2864    | 99.39 | MGMT      |
| Bloom syndrome protein                                        | Homo sapiens          | CHEMBL1293237 | 98.13 | BLM       |
| Sucrase-isomaltase                                            | Homo sapiens          | CHEMBL2748    | 97.57 | SI        |
| Adenosine A1 receptor                                         | Rattus norvegicus     | CHEMBL318     | 96.59 | Adora1    |
| Beta amyloid A4 protein                                       | Homo sapiens          | CHEMBL2487    | 95.19 | APP       |
| Carbonic anhydrase VI                                         | Homo sapiens          | CHEMBL3025    | 94.26 | CA6       |
| Carbonic anhydrase II                                         | Homo sapiens          | CHEMBL205     | 91.27 | CA2       |
| Inosine-5'-monophosphate dehydrogenase 1                      | Homo sapiens          | CHEMBL1822    | 83.29 | IMPDH1    |
| Carbonic anhydrase I                                          | Homo sapiens          | CHEMBL261     | 82.8  | CA1       |
| Equilibrative nucleoside transporter 1                        | Homo sapiens          | CHEMBL1997    | 82.67 | SLC29A1   |
| Tubulin beta-1 chain                                          | Homo sapiens          | CHEMBL1915    | 81.1  | TUBB1     |

|                                                            |              |               |       |         |
|------------------------------------------------------------|--------------|---------------|-------|---------|
| Macrophage migration inhibitory factor                     | Homo sapiens | CHEMBL2085    | 74.94 | MIF     |
| Alpha-L-fucosidase I                                       | Homo sapiens | CHEMBL4176    | 63.53 | FUCA1   |
| Transthyretin                                              | Homo sapiens | CHEMBL3194    | 55.82 | TTR     |
| DNA topoisomerase I                                        | Homo sapiens | CHEMBL1781    | 55.53 | TOP1    |
| Solute carrier organic anion transporter family member 1B3 | Homo sapiens | CHEMBL1743121 | 45.16 | SLCO1B3 |
| Solute carrier organic anion transporter family member 1B1 | Homo sapiens | CHEMBL1697668 | 41.62 | SLCO1B1 |
| Nuclear factor NF-kappa-B p53 subunit                      | Homo sapiens | CHEMBL5533    | 35.63 | RELA    |
| Ribosomal protein S6 kinase alpha 3                        | Homo sapiens | CHEMBL2345    | 25.91 | RPS6KA3 |
| Purinergic receptor P2Y14                                  | Homo sapiens | CHEMBL4518    | 24.95 | P2RY14  |
| Sodium/glucose cotransporter 1                             | Homo sapiens | CHEMBL4979    | 24.35 | SLC5A1  |

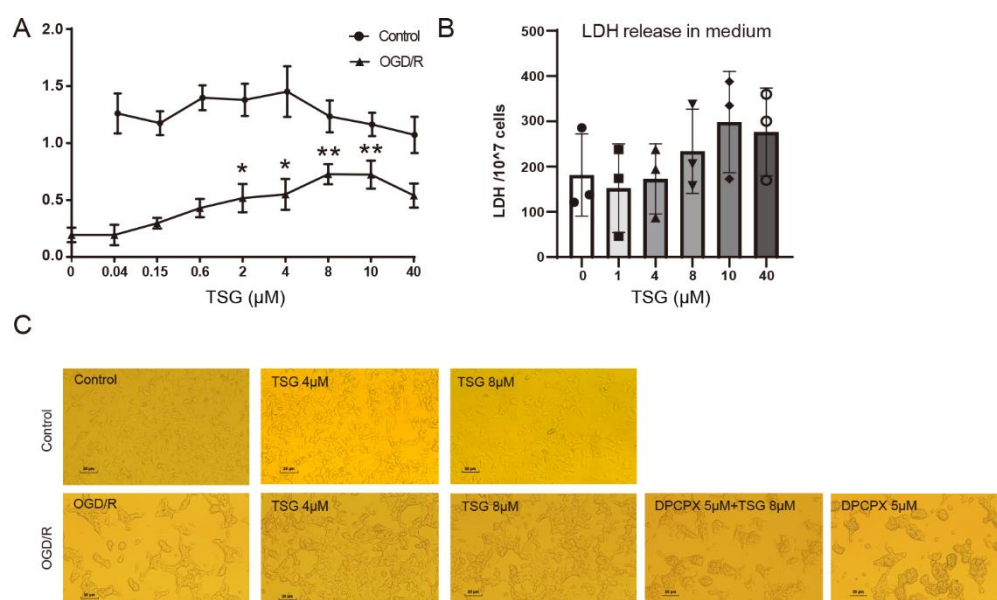

Figure S1. The effects of TSG on SH-SY5Y cells in normoxic conditions. (A) The changes in cell viability with the different concentrations of TSG (24 h) in normoxic conditions/after OGD/R. (B) The changes in LDH release with the different concentrations of TSG (24 h) in normoxic conditions. (C) The changes of cell morphology with 4 and 8  $\mu$ M TSG (24 h) in normoxic conditions/after OGD/R. \*  $p < 0.05$ , \*\*  $p < 0.01$  and \*\*\*  $p < 0.001$ , other groups versus Model group.

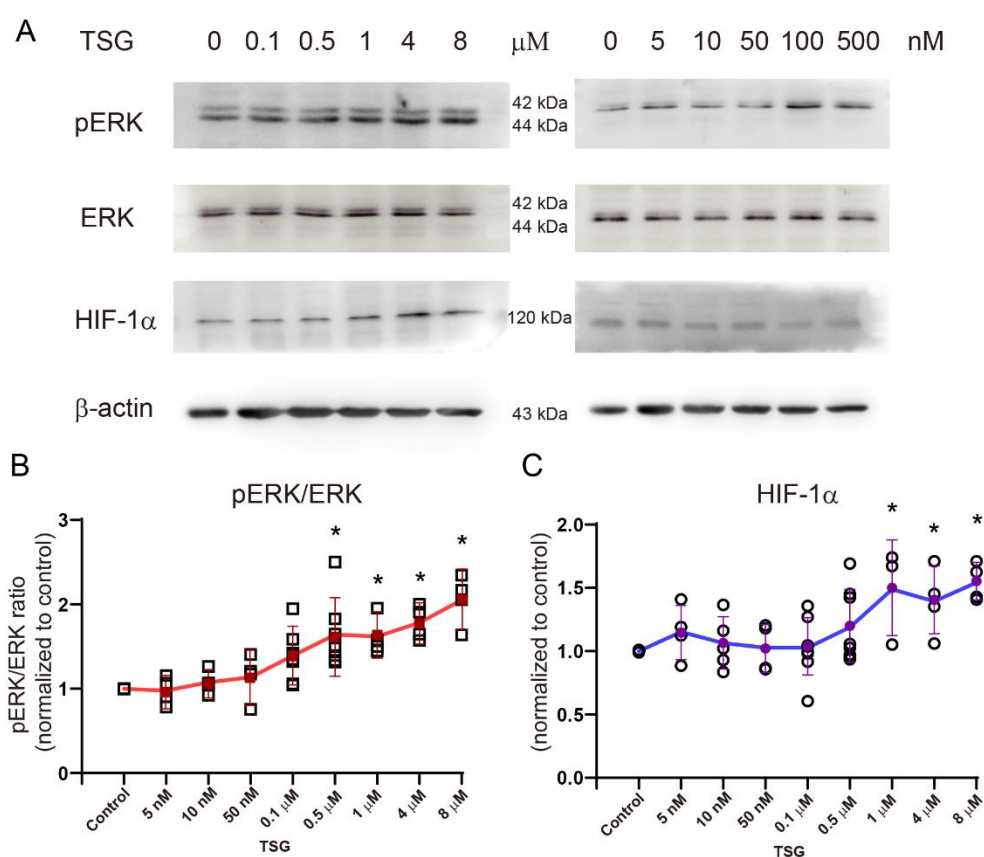

Figure S2. The effects of TSG at different concentrations on the protein level of pERK and HIF-1α in normoxic conditions. (A) The changes of pERK, ERK, HIF-1α and β-actin protein levels in SH-SY5Y cells after incubated with different concentrations of TSG for 24 h in normoxic conditions were tested by western blot assay. (B) The relative intensity was analyzed with Image J software and calculated by the ratio relative to the ERK/β-actin intensity. \*  $p < 0.05$ , \*\*  $p < 0.01$  and \*\*\*  $p < 0.001$ , other groups versus Control group.
